# Supplementary material
Source: PubMed Central journal article supplement (PMC3245240)
Supplement: halms439883-supplement_1.pdf [file halms439883-supplement_1.pdf]

| # | #                      | #   | #   | #    | #      | ASTRO | ASTRO<br>+<br>TGF $\alpha$ | IRRADIATED<br>ASTRO<br>+<br>TGF $\alpha$<br>ADHERENT<br>CELLS | IRRADIATED<br>ASTRO<br>+<br>TGF $\alpha$<br>FLOATING<br>CELLS | TUMORS<br>FROM<br>IRRADIATED<br>ASTRO<br>+<br>TGF $\alpha$<br>ADHERENT<br>CELLS | TUMORS<br>FROM<br>IRRADIATED<br>ASTRO<br>+<br>TGF $\alpha$<br>FLOATING<br>CELLS |
|---|------------------------|-----|-----|------|--------|-------|----------------------------|---------------------------------------------------------------|---------------------------------------------------------------|---------------------------------------------------------------------------------|---------------------------------------------------------------------------------|
| n | chrxx                  | chr | arm | band | band2  |       |                            |                                                               |                                                               |                                                                                 |                                                                                 |
| 1 | chr1:0-8912711         | 1   | 1q  | 1qA1 | 1qA1   | 0     | 0                          | 0                                                             | 0                                                             | 0                                                                               | 0                                                                               |
| 2 | chr1:8912711-12378766  | 1   | 1q  | 1qA2 | 1qA2   | 0     | 0                          | 0                                                             | 0                                                             | 0                                                                               | 0                                                                               |
| 3 | chr1:12378766-20301176 | 1   | 1q  | 1qA3 | 1qA3   | 0     | 0                          | 0                                                             | 0                                                             | 0                                                                               | 0                                                                               |
| 4 | chr1:20301176-22281779 | 1   | 1q  | 1qA4 | 1qA4   | 0     | 0                          | 0                                                             | 0                                                             | 0                                                                               | 0                                                                               |
| 5 | chr1:22281779-31194491 | 1   | 1q  | 1qA5 | 1qA5   | 0     | 0                          | 0                                                             | 0                                                             | 0                                                                               | 0                                                                               |
| 6 | chr1:31194491-43573257 | 1   | 1q  | 1qB  | 1qB    | 0     | 0                          | 0                                                             | 0                                                             | 0                                                                               | 0                                                                               |
| 7 | chr1:43573257-54961723 | 1   | 1q  | 1qC1 | 1qC1.1 | 0     | 0                          | 0                                                             | 0                                                             | 0                                                                               | 0                                                                               |
| 8 | chr1:54961723-         | 1   | 1q  | 1qC1 | 1qC1.2 | 0     | 0                          | 0                                                             | 0                                                             | 0                                                                               | 0                                                                               |

|    |                          |   |    |      |        |   |   |   |   |   |   |
|----|--------------------------|---|----|------|--------|---|---|---|---|---|---|
|    | 56447175                 |   |    |      |        |   |   |   |   |   |   |
| 9  | chr1:56447175-59913229   | 1 | 1q | 1qC1 | 1qC1.3 | 0 | 0 | 0 | 0 | 0 | 0 |
| 10 | chr1:59913229-65855037   | 1 | 1q | 1qC2 | 1qC2   | 0 | 0 | 0 | 0 | 0 | 0 |
| 11 | chr1:65855037-75262900   | 1 | 1q | 1qC3 | 1qC3   | 0 | 0 | 0 | 0 | 0 | 0 |
| 12 | chr1:75262900-80709557   | 1 | 1q | 1qC4 | 1qC4   | 0 | 0 | 0 | 0 | 0 | 0 |
| 13 | chr1:80709557-88136817   | 1 | 1q | 1qC5 | 1qC5   | 0 | 0 | 0 | 0 | 0 | 0 |
| 14 | chr1:88136817-100515583  | 1 | 1q | 1qD  | 1qD    | 0 | 0 | 0 | 0 | 0 | 0 |
| 15 | chr1:100515583-103486487 | 1 | 1q | 1qE1 | 1qE1.1 | 0 | 0 | 0 | 0 | 0 | 0 |
| 16 | chr1:103486487-104476788 | 1 | 1q | 1qE1 | 1qE1.2 | 0 | 0 | 0 | 0 | 0 | 0 |
| 17 | chr1:104476788-113389500 | 1 | 1q | 1qE2 | 1qE2.1 | 0 | 0 | 0 | 0 | 0 | 0 |
| 18 | chr1:113389500-114874952 | 1 | 1q | 1qE2 | 1qE2.2 | 0 | 0 | 0 | 0 | 0 | 0 |
| 19 | chr1:114874952-126758568 | 1 | 1q | 1qE2 | 1qE2.3 | 0 | 0 | 0 | 0 | 0 | 0 |
| 20 | chr1:126758568-129729472 | 1 | 1q | 1qE3 | 1qE3   | 0 | 0 | 0 | 0 | 0 | 0 |

|    |                              |   |    |      |        |             |             |         |         |         |         |
|----|------------------------------|---|----|------|--------|-------------|-------------|---------|---------|---------|---------|
| 21 | chr1:129729472<br>-140622786 | 1 | 1q | 1qE4 | 1qE4   | 0           | 0           | 0       | 0       | 0       | 0       |
| 22 | chr1:140622786<br>-148545197 | 1 | 1q | 1qF  | 1qF    | 0           | 1.2800      | 0       | 0       | 0       | 0       |
| 23 | chr1:148545197<br>-153001553 | 1 | 1q | 1qG1 | 1qG1   | 0           | 0           | 0       | 0       | 0       | 0       |
| 24 | chr1:153001553<br>-153991854 | 1 | 1q | 1qG2 | 1qG2   | 0           | 0           | 0       | 0       | 0       | 0       |
| 25 | chr1:153991854<br>-158448210 | 1 | 1q | 1qG3 | 1qG3   | 0           | 0           | 0       | 0       | 0       | 0       |
| 26 | chr1:158448210<br>-161419114 | 1 | 1q | 1qH1 | 1qH1   | 0           | 0           | 0       | 0       | 0       | 0       |
| 27 | chr1:161419114<br>-165380319 | 1 | 1q | 1qH2 | 1qH2.1 | 0           | 0           | 0       | 0       | 0       | 0       |
| 28 | chr1:165380319<br>-166865771 | 1 | 1q | 1qH2 | 1qH2.2 | 0           | 0           | 0       | 0       | 0       | 0       |
| 29 | chr1:166865771<br>-171322127 | 1 | 1q | 1qH2 | 1qH2.3 | 0           | 0           | 0       | 0       | 0       | 0       |
| 30 | chr1:171322127<br>-177263935 | 1 | 1q | 1qH3 | 1qH3   | -<br>1.5200 | -<br>1.5500 | -1.5700 | -1.6200 | 0.6200  | -1.0700 |
| 31 | chr1:177263935<br>-183205743 | 1 | 1q | 1qH4 | 1qH4   | 0           | 0           | 0       | 0       | 0       | 0       |
| 32 | chr1:183205743<br>-189642702 | 1 | 1q | 1qH5 | 1qH5   | 0           | 0           | 0       | -1.1000 | -1.0500 | -1.0100 |
| 33 | chr1:189642702               | 1 | 1q | 1qH6 | 1qH6   | 0           | 0           | 0       | 0       | 0       | 0       |

|    |                          |   |    |      |        |         |         |         |         |         |         |
|----|--------------------------|---|----|------|--------|---------|---------|---------|---------|---------|---------|
|    | -197069962               |   |    |      |        |         |         |         |         |         |         |
| 34 | chr2:0-14070368          | 2 | 2q | 2qA1 | 2qA1   | 0       | 0       | 0       | 0       | 0       | 0       |
| 35 | chr2:14070368-16415429   | 2 | 2q | 2qA2 | 2qA2   | 0       | 0       | 0       | 0       | 0       | 0       |
| 36 | chr2:16415429-29078760   | 2 | 2q | 2qA3 | 2qA3   | 0       | 0       | 0       | 0       | 0       | 0       |
| 37 | chr2:29078760-48308264   | 2 | 2q | 2qB  | 2qB    | 0       | 0       | 0       | 0       | -0.4200 | 0       |
| 38 | chr2:48308264-60502583   | 2 | 2q | 2qC1 | 2qC1.1 | 0       | 0       | 0       | 0       | 0       | 0       |
| 39 | chr2:60502583-60971595   | 2 | 2q | 2qC1 | 2qC1.2 | 0       | 0       | 0       | 0       | 0       | 0       |
| 40 | chr2:60971595-68475791   | 2 | 2q | 2qC1 | 2qC1.3 | 0       | 0       | 0       | 0       | 0       | 0       |
| 41 | chr2:68475791-71758877   | 2 | 2q | 2qC2 | 2qC2   | 0       | 0       | 0       | 0       | 0       | 0       |
| 42 | chr2:71758877-81139123   | 2 | 2q | 2qC3 | 2qC3   | -2.4700 | -2.5300 | -2.5700 | -2.6100 | -2.5500 | -2.5500 |
| 43 | chr2:81139123-88643319   | 2 | 2q | 2qD  | 2qD    | 0       | 0       | -0.2800 | 0       | 0       | 0       |
| 44 | chr2:88643319-101306651  | 2 | 2q | 2qE1 | 2qE1   | 0       | 0       | -0.2800 | 0       | 0       | 0       |
| 45 | chr2:101306651-105058749 | 2 | 2q | 2qE2 | 2qE2   | 0       | 0       | 0       | 0       | 0       | 0       |

|    |                              |   |    |      |      |        |        |        |        |        |        |
|----|------------------------------|---|----|------|------|--------|--------|--------|--------|--------|--------|
| 46 | chr2:105058749<br>-113031957 | 2 | 2q | 2qE3 | 2qE3 | 0      | 0      | 0      | 0      | 0      | 0      |
| 47 | chr2:113031957<br>-115846031 | 2 | 2q | 2qE4 | 2qE4 | 0      | 0      | 0      | 0      | 0      | 0      |
| 48 | chr2:115846031<br>-123819240 | 2 | 2q | 2qE5 | 2qE5 | 0.8400 | 0.8600 | 1.0400 | 0.9200 | 0.8200 | 0.7700 |
| 49 | chr2:123819240<br>-131792448 | 2 | 2q | 2qF1 | 2qF1 | 0      | 0      | 0      | 0      | 0      | 0      |
| 50 | chr2:131792448<br>-134606522 | 2 | 2q | 2qF2 | 2qF2 | 0      | 0      | 0      | 0      | 0      | 0      |
| 51 | chr2:134606522<br>-141172694 | 2 | 2q | 2qF3 | 2qF3 | 0      | 0      | 0      | 0      | 0      | 0      |
| 52 | chr2:141172694<br>-146800841 | 2 | 2q | 2qG1 | 2qG1 | 0      | 0      | 0      | 0      | 0      | 0      |
| 53 | chr2:146800841<br>-147738866 | 2 | 2q | 2qG2 | 2qG2 | 0      | 0      | 0      | 0      | 0      | 0      |
| 54 | chr2:147738866<br>-152428988 | 2 | 2q | 2qG3 | 2qG3 | 0      | 0      | 0      | 0      | 0      | 0      |
| 55 | chr2:152428988<br>-158995160 | 2 | 2q | 2qH1 | 2qH1 | 0      | 0      | 0      | 0      | 0      | 0      |
| 56 | chr2:158995160<br>-163216271 | 2 | 2q | 2qH2 | 2qH2 | 0      | 0      | 0      | 0      | 0      | 0      |
| 57 | chr2:163216271<br>-173534541 | 2 | 2q | 2qH3 | 2qH3 | 0      | 0      | 0      | 0      | 0      | 0      |
| 58 | chr2:173534541               | 2 | 2q | 2qH4 | 2qH4 | 0      | 0      | 0      | 0      | 0      | 0      |

|    |                         |   |    |      |        |   |   |        |        |   |   |
|----|-------------------------|---|----|------|--------|---|---|--------|--------|---|---|
|    | -181976762              |   |    |      |        |   |   |        |        |   |   |
| 59 | chr3:0-18521769         | 3 | 3q | 3qA1 | 3qA1   | 0 | 0 | 0      | 0      | 0 | 0 |
| 60 | chr3:18521769-20471428  | 3 | 3q | 3qA2 | 3qA2   | 0 | 0 | 0      | 0      | 0 | 0 |
| 61 | chr3:20471428-35581293  | 3 | 3q | 3qA3 | 3qA3   | 0 | 0 | 0      | 0      | 0 | 0 |
| 62 | chr3:35581293-46791837  | 3 | 3q | 3qB  | 3qB    | 0 | 0 | 0      | 0      | 0 | 0 |
| 63 | chr3:46791837-56540137  | 3 | 3q | 3qC  | 3qC    | 0 | 0 | 0.9000 | 0      | 0 | 0 |
| 64 | chr3:56540137-60926871  | 3 | 3q | 3qD  | 3qD    | 0 | 0 | 0      | 0      | 0 | 0 |
| 65 | chr3:60926871-69700341  | 3 | 3q | 3qE1 | 3qE1   | 0 | 0 | 0      | 0      | 0 | 0 |
| 66 | chr3:69700341-72624831  | 3 | 3q | 3qE2 | 3qE2   | 0 | 0 | 0      | 0      | 0 | 0 |
| 67 | chr3:72624831-83835375  | 3 | 3q | 3qE3 | 3qE3   | 0 | 0 | 0      | 0      | 0 | 0 |
| 68 | chr3:83835375-93096260  | 3 | 3q | 3qF1 | 3qF1   | 0 | 0 | 0      | 0.3000 | 0 | 0 |
| 69 | chr3:93096260-97482995  | 3 | 3q | 3qF2 | 3qF2.1 | 0 | 0 | 0      | 0      | 0 | 0 |
| 70 | chr3:97482995-106256464 | 3 | 3q | 3qF2 | 3qF2.2 | 0 | 0 | 0      | 0      | 0 | 0 |

|    |                          |   |    |      |        |   |   |   |   |   |   |
|----|--------------------------|---|----|------|--------|---|---|---|---|---|---|
| 71 | chr3:106256464-108206124 | 3 | 3q | 3qF2 | 3qF2.3 | 0 | 0 | 0 | 0 | 0 | 0 |
| 72 | chr3:108206124-115029934 | 3 | 3q | 3qF3 | 3qF3   | 0 | 0 | 0 | 0 | 0 | 0 |
| 73 | chr3:115029934-126727893 | 3 | 3q | 3qG1 | 3qG1   | 0 | 0 | 0 | 0 | 0 | 0 |
| 74 | chr3:126727893-128677553 | 3 | 3q | 3qG2 | 3qG2   | 0 | 0 | 0 | 0 | 0 | 0 |
| 75 | chr3:128677553-138425853 | 3 | 3q | 3qG3 | 3qG3   | 0 | 0 | 0 | 0 | 0 | 0 |
| 76 | chr3:138425853-143787417 | 3 | 3q | 3qH1 | 3qH1   | 0 | 0 | 0 | 0 | 0 | 0 |
| 77 | chr3:143787417-148174152 | 3 | 3q | 3qH2 | 3qH2   | 0 | 0 | 0 | 0 | 0 | 0 |
| 78 | chr3:148174152-154023132 | 3 | 3q | 3qH3 | 3qH3   | 0 | 0 | 0 | 0 | 0 | 0 |
| 79 | chr3:154023132-159872112 | 3 | 3q | 3qH4 | 3qH4   | 0 | 0 | 0 | 0 | 0 | 0 |
| 80 | chr4:0-14742088          | 4 | 4q | 4qA1 | 4qA1   | 0 | 0 | 0 | 0 | 0 | 0 |
| 81 | chr4:14742088-17595395   | 4 | 4q | 4qA2 | 4qA2   | 0 | 0 | 0 | 0 | 0 | 0 |
| 82 | chr4:17595395-28057522   | 4 | 4q | 4qA3 | 4qA3   | 0 | 0 | 0 | 0 | 0 | 0 |
| 83 | chr4:28057522-           | 4 | 4q | 4qA4 | 4qA4   | 0 | 0 | 0 | 0 | 0 | 0 |

|    |                          |   |    |      |      |         |         |         |         |         |         |
|----|--------------------------|---|----|------|------|---------|---------|---------|---------|---------|---------|
|    | 29959727                 |   |    |      |      |         |         |         |         |         |         |
| 84 | chr4:29959727-43275161   | 4 | 4q | 4qA5 | 4qA5 | 0       | 0       | 0       | 0       | 0       | 0       |
| 85 | chr4:43275161-51359532   | 4 | 4q | 4qB1 | 4qB1 | 0       | 0       | 0       | 0       | 0       | 0       |
| 86 | chr4:51359532-54688391   | 4 | 4q | 4qB2 | 4qB2 | 0       | 0       | 0       | 0       | 0       | 0       |
| 87 | chr4:54688391-62772762   | 4 | 4q | 4qB3 | 4qB3 | -1.2200 | -1.1700 | -1.1700 | -1.2100 | -0.9900 | -0.9400 |
| 88 | chr4:62772762-68954928   | 4 | 4q | 4qC1 | 4qC1 | 0       | 0       | 0       | 0       | 0       | 0       |
| 89 | chr4:68954928-71332684   | 4 | 4q | 4qC2 | 4qC2 | 0       | 0       | 0       | 0       | 0       | 0       |
| 90 | chr4:71332684-83221465   | 4 | 4q | 4qC3 | 4qC3 | 0       | 0       | 0       | 0       | 0       | 0       |
| 91 | chr4:83221465-88928080   | 4 | 4q | 4qC4 | 4qC4 | 0       | 0       | -0.9100 | -0.9700 | -0.7100 | 0       |
| 92 | chr4:88928080-96536899   | 4 | 4q | 4qC5 | 4qC5 | 0       | 0       | 0       | 0       | 0       | 0       |
| 93 | chr4:96536899-104621270  | 4 | 4q | 4qC6 | 4qC6 | 0       | 0       | 0       | 0       | 0       | 0       |
| 94 | chr4:104621270-109852334 | 4 | 4q | 4qC7 | 4qC7 | 0       | 0       | 0       | 0       | 0       | 0       |
| 95 | chr4:109852334-116510051 | 4 | 4q | 4qD1 | 4qD1 | 2.6500  | 2.6300  | 2.3800  | 2.4200  | 3.8300  | 4.1700  |



|     |                          |   |    |      |        |   |        |         |         |         |         |
|-----|--------------------------|---|----|------|--------|---|--------|---------|---------|---------|---------|
| 96  | chr4:116510051-119363358 | 4 | 4q | 4qD2 | 4qD2.1 | 0 | 0      | 0       | 0       | 0       | 0       |
| 97  | chr4:119363358-129825485 | 4 | 4q | 4qD2 | 4qD2.2 | 0 | 0      | 0       | 0       | 0       | 0       |
| 98  | chr4:129825485-132678793 | 4 | 4q | 4qD2 | 4qD2.3 | 0 | 0      | 0       | 0       | 0       | 0       |
| 99  | chr4:132678793-140287612 | 4 | 4q | 4qD3 | 4qD3   | 0 | 0      | -0.8400 | -1.0600 | -0.7500 | -0.4900 |
| 100 | chr4:140287612-146469778 | 4 | 4q | 4qE1 | 4qE1   | 0 | 0      | 0       | 0.4800  | 0       | 0       |
| 101 | chr4:146469778-155029701 | 4 | 4q | 4qE2 | 4qE2   | 0 | 0.0800 | 0       | 0       | 0       | 0       |
| 102 | chr5:0-14911692          | 5 | 5q | 5qA1 | 5qA1   | 0 | 0      | 0       | 0       | 0       | 0       |
| 103 | chr5:14911692-16354759   | 5 | 5q | 5qA2 | 5qA2   | 0 | 0      | 0       | 0       | 0       | 0       |
| 104 | chr5:16354759-25494184   | 5 | 5q | 5qA3 | 5qA3   | 0 | 0      | 0       | 0       | 0       | 0       |
| 105 | chr5:25494184-33671564   | 5 | 5q | 5qB1 | 5qB1   | 0 | 0      | 0       | 1.2000  | 0       | 0       |
| 106 | chr5:33671564-35595653   | 5 | 5q | 5qB2 | 5qB2   | 0 | 0      | 0       | 0       | 0       | 0       |
| 107 | chr5:35595653-50507346   | 5 | 5q | 5qB3 | 5qB3   | 0 | 0      | 0       | 0       | 0       | 0       |
| 108 | chr5:50507346-           | 5 | 5q | 5qC1 | 5qC1   | 0 | 0      | 0       | 0       | 0       | 0       |

|     |                          |   |    |      |        |   |   |         |   |         |   |
|-----|--------------------------|---|----|------|--------|---|---|---------|---|---------|---|
|     | 58684726                 |   |    |      |        |   |   |         |   |         |   |
| 109 | chr5:58684726-61089838   | 5 | 5q | 5qC2 | 5qC2   | 0 | 0 | 0       | 0 | 0       | 0 |
| 110 | chr5:61089838-71672330   | 5 | 5q | 5qC3 | 5qC3.1 | 0 | 0 | 0       | 0 | 0       | 0 |
| 111 | chr5:71672330-73596419   | 5 | 5q | 5qC3 | 5qC3.2 | 0 | 0 | 0       | 0 | 0       | 0 |
| 112 | chr5:73596419-77925620   | 5 | 5q | 5qC3 | 5qC3.3 | 0 | 0 | 0       | 0 | 0       | 0 |
| 113 | chr5:77925620-81773799   | 5 | 5q | 5qD  | 5qD    | 0 | 0 | 0       | 0 | 0       | 0 |
| 114 | chr5:81773799-91394246   | 5 | 5q | 5qE1 | 5qE1   | 0 | 0 | -0.2600 | 0 | -0.2500 | 0 |
| 115 | chr5:91394246-93799358   | 5 | 5q | 5qE2 | 5qE2   | 0 | 0 | 0       | 0 | 0       | 0 |
| 116 | chr5:93799358-99571626   | 5 | 5q | 5qE3 | 5qE3   | 0 | 0 | 0       | 0 | 0       | 0 |
| 117 | chr5:99571626-101976738  | 5 | 5q | 5qE4 | 5qE4   | 0 | 0 | 0       | 0 | 0       | 0 |
| 118 | chr5:101976738-107749006 | 5 | 5q | 5qE5 | 5qE5   | 0 | 0 | 0       | 0 | 0       | 0 |
| 119 | chr5:107749006-125065811 | 5 | 5q | 5qF  | 5qF    | 0 | 0 | 0       | 0 | 0       | 0 |
| 120 | chr5:125065811-126989900 | 5 | 5q | 5qG1 | 5qG1.1 | 0 | 0 | 0       | 0 | 0       | 0 |

|     |                          |   |    |      |        |   |   |         |         |         |         |
|-----|--------------------------|---|----|------|--------|---|---|---------|---------|---------|---------|
| 121 | chr5:126989900-127951945 | 5 | 5q | 5qG1 | 5qG1.2 | 0 | 0 | 0       | 0       | 0       | 0       |
| 122 | chr5:127951945-130838079 | 5 | 5q | 5qG1 | 5qG1.3 | 0 | 0 | 0       | 0       | 0       | 0       |
| 123 | chr5:130838079-146230794 | 5 | 5q | 5qG2 | 5qG2   | 0 | 0 | 0       | 0       | 0       | 0       |
| 124 | chr5:146230794-152003063 | 5 | 5q | 5qG3 | 5qG3   | 0 | 0 | 0       | 0       | 0       | 0       |
| 125 | chr6:0-16613965          | 6 | 6q | 6qA1 | 6qA1   | 0 | 0 | -1.0200 | -1.0300 | -0.8300 | -0.7500 |
| 126 | chr6:16613965-21500425   | 6 | 6q | 6qA2 | 6qA2   | 0 | 0 | 0.2900  | 0.4300  | 0.3600  | 0.3500  |
| 127 | chr6:21500425-27364177   | 6 | 6q | 6qA3 | 6qA3.1 | 0 | 0 | 0.2900  | 0.4300  | 0.3600  | 0.3500  |
| 128 | chr6:27364177-28341469   | 6 | 6q | 6qA3 | 6qA3.2 | 0 | 0 | 0.2900  | 0.4300  | 0.3600  | 0.3500  |
| 129 | chr6:28341469-34205222   | 6 | 6q | 6qA3 | 6qA3.3 | 0 | 0 | 0.2900  | 0.4300  | 0.3600  | 0.3500  |
| 130 | chr6:34205222-41534912   | 6 | 6q | 6qB1 | 6qB1   | 0 | 0 | 0.2900  | 0.4300  | 0.3600  | 0.3500  |
| 131 | chr6:41534912-44466788   | 6 | 6q | 6qB2 | 6qB2.1 | 0 | 0 | 0.2900  | 0.4300  | 0.3600  | 0.3500  |
| 132 | chr6:44466788-45932726   | 6 | 6q | 6qB2 | 6qB2.2 | 0 | 0 | 0.2900  | 0.4300  | 0.3600  | 0.3500  |
| 133 | chr6:45932726-           | 6 | 6q | 6qB2 | 6qB2.3 |   |   | 0.2900  | 0.4300  | 0.3600  | 0.3500  |

|     |                          |   |    |      |      |        |        |        |        |        |        |
|-----|--------------------------|---|----|------|------|--------|--------|--------|--------|--------|--------|
|     | 50819187                 |   |    |      |      | 0.9400 | 1.0000 |        |        |        |        |
| 134 | chr6:50819187-62546691   | 6 | 6q | 6qB3 | 6qB3 | 0      | 0      | 0.2900 | 0.4300 | 0.3600 | 0.3500 |
| 135 | chr6:62546691-74274196   | 6 | 6q | 6qC1 | 6qC1 | 0      | 0      | 0.2900 | 0.4300 | 0.3600 | 0.3500 |
| 136 | chr6:74274196-76717426   | 6 | 6q | 6qC2 | 6qC2 | 0      | 0      | 0.2900 | 0.4300 | 0      | 0.3500 |
| 137 | chr6:76717426-86001701   | 6 | 6q | 6qC3 | 6qC3 | 0      | 0      | 0.2900 | 0.4300 | 0.3600 | 0.3500 |
| 138 | chr6:86001701-94308683   | 6 | 6q | 6qD1 | 6qD1 | 0      | 0      | 0.2900 | 0.4300 | 0.3600 | 0.3500 |
| 139 | chr6:94308683-95774621   | 6 | 6q | 6qD2 | 6qD2 | 0      | 0      | 0.2900 | 0.4300 | 0.3600 | 0.3500 |
| 140 | chr6:95774621-103104312  | 6 | 6q | 6qD3 | 6qD3 | 0      | 0      | 0.2900 | 0.4300 | 0.3600 | 0.3500 |
| 141 | chr6:103104312-108479418 | 6 | 6q | 6qE1 | 6qE1 | 0      | 0      | 0.2900 | 0.4300 | 0.3600 | 0.3500 |
| 142 | chr6:108479418-109456710 | 6 | 6q | 6qE2 | 6qE2 | 0      | 0      | 0.2900 | 0.4300 | 0.3600 | 0.3500 |
| 143 | chr6:109456710-116786401 | 6 | 6q | 6qE3 | 6qE3 | 0      | 0      | 0.2900 | 0.4300 | 0.3600 | 0.3500 |
| 144 | chr6:116786401-122650153 | 6 | 6q | 6qF1 | 6qF1 | 0      | 0      | 0      | 0      | 0      | 0      |
| 145 | chr6:122650153-125093383 | 6 | 6q | 6qF2 | 6qF2 | 0      | 0      | 0      | 0      | 0      | 0      |

|     |                          |   |    |      |      |        |        |         |         |         |         |
|-----|--------------------------|---|----|------|------|--------|--------|---------|---------|---------|---------|
| 146 | chr6:125093383-131934427 | 6 | 6q | 6qF3 | 6qF3 | 0.9500 | 1.0500 | -0.2700 | -0.2700 | 0.6400  | 0.8400  |
| 147 | chr6:131934427-139264118 | 6 | 6q | 6qG1 | 6qG1 | 0      | 0      | -0.2700 | -0.2700 | -0.2600 | 0       |
| 148 | chr6:139264118-142684640 | 6 | 6q | 6qG2 | 6qG2 | 0      | 0      | 0       | 0       | 0       | 0       |
| 149 | chr6:142684640-149525685 | 6 | 6q | 6qG3 | 6qG3 | 0      | 0      | 0       | 0       | 0       | 0       |
| 150 | chr7:0-15170811          | 7 | 7q | 7qA1 | 7qA1 | 0      | 0      | 0.3000  | 0.3000  | 0.2900  | 0       |
| 151 | chr7:15170811-18204973   | 7 | 7q | 7qA2 | 7qA2 | 0      | 0      | 0.3600  | 0.4500  | 0.2900  | 0       |
| 152 | chr7:18204973-28318847   | 7 | 7q | 7qA3 | 7qA3 | 0      | 0      | 0.3600  | 0.4500  | 0.3600  | 0       |
| 153 | chr7:28318847-34387172   | 7 | 7q | 7qB1 | 7qB1 | 0      | 0      | 0.3600  | 0.4500  | 0.3600  | 0       |
| 154 | chr7:34387172-37421334   | 7 | 7q | 7qB2 | 7qB2 | 0      | 0      | 0.3600  | 0.4500  | 0.3600  | 0       |
| 155 | chr7:37421334-47535208   | 7 | 7q | 7qB3 | 7qB3 | 0.8900 | 0.9000 | 0.4300  | 0.4500  | 0.2900  | 0.2600  |
| 156 | chr7:47535208-54109226   | 7 | 7q | 7qB4 | 7qB4 | 0      | 0      | 0.3000  | 0.3000  | 0.2900  | 0       |
| 157 | chr7:54109226-60683244   | 7 | 7q | 7qB5 | 7qB5 | 0      | 0      | 0.3000  | 0.3000  | 0       | 0       |
| 158 | chr7:60683244-           | 7 | 7q | 7qC  | 7qC  | -      | -      | 0.3000  | -0.4000 | 0.2900  | -0.5500 |

|     |                          |   |    |      |        |        |        |        |        |        |        |
|-----|--------------------------|---|----|------|--------|--------|--------|--------|--------|--------|--------|
|     | 71302812                 |   |    |      |        | 0.7200 | 0.6800 |        |        |        |        |
| 159 | chr7:71302812-76865443   | 7 | 7q | 7qD1 | 7qD1   | 0      | 0      | 0.3000 | 0.2200 | 0.2900 | 0      |
| 160 | chr7:76865443-80405299   | 7 | 7q | 7qD2 | 7qD2   | 0      | 0      | 0.3000 | 0.2200 | 0.2900 | 0      |
| 161 | chr7:80405299-90013479   | 7 | 7q | 7qD3 | 7qD3   | 0      | 0      | 0.3000 | 0.2200 | 0.2900 | 0      |
| 162 | chr7:90013479-99621660   | 7 | 7q | 7qE1 | 7qE1   | 0      | 0      | 0.3000 | 0.2200 | 0.2900 | 0      |
| 163 | chr7:99621660-102150128  | 7 | 7q | 7qE2 | 7qE2   | 0      | 0      | 0.3000 | 0.2200 | 0.2900 | 0      |
| 164 | chr7:102150128-111252615 | 7 | 7q | 7qE3 | 7qE3   | 1.9800 | 2.0000 | 0.3000 | 0.2200 | 0.2900 | 1.7300 |
| 165 | chr7:111252615-118332327 | 7 | 7q | 7qF1 | 7qF1   | 0      | 0      | 0.3000 | 0      | 0.2900 | 0      |
| 166 | chr7:118332327-122883570 | 7 | 7q | 7qF2 | 7qF2   | 0      | 0      | 0.3000 | 0      | 0.2900 | 0      |
| 167 | chr7:122883570-137042994 | 7 | 7q | 7qF3 | 7qF3   | 0      | 0      | 0.3000 | 0      | 0.2900 | 0.9500 |
| 168 | chr7:137042994-140582850 | 7 | 7q | 7qF4 | 7qF4   | 0      | 0      | 0.3000 | 0      | 0.2900 | 0      |
| 169 | chr7:140582850-145134094 | 7 | 7q | 7qF5 | 7qF5   | 0      | 0      | 0.3000 | 0.3000 | 0.2900 | 0      |
| 170 | chr8:0-16271352          | 8 | 8q | 8qA1 | 8qA1.1 | 0      | 0      | 0      | 0      | 0      | 0      |

|     |                        |   |    |      |        |        |        |   |   |         |   |
|-----|------------------------|---|----|------|--------|--------|--------|---|---|---------|---|
| 171 | chr8:16271352-17228491 | 8 | 8q | 8qA1 | 8qA1.2 | 0      | 0      | 0 | 0 | 0       | 0 |
| 172 | chr8:17228491-20578475 | 8 | 8q | 8qA1 | 8qA1.3 | 0      | 0      | 0 | 0 | 0       | 0 |
| 173 | chr8:20578475-30149859 | 8 | 8q | 8qA2 | 8qA2   | 0      | 0      | 0 | 0 | 0       | 0 |
| 174 | chr8:30149859-34456982 | 8 | 8q | 8qA3 | 8qA3   | 1.0500 | 0.7800 | 0 | 0 | 0.7900  | 0 |
| 175 | chr8:34456982-44985504 | 8 | 8q | 8qA4 | 8qA4   | 0      | 0      | 0 | 0 | -0.3200 | 0 |
| 176 | chr8:44985504-49292627 | 8 | 8q | 8qB1 | 8qB1.1 | 0      | 0      | 0 | 0 | -0.3200 | 0 |
| 177 | chr8:49292627-51206903 | 8 | 8q | 8qB1 | 8qB1.2 | 0      | 0      | 0 | 0 | 0       | 0 |
| 178 | chr8:51206903-56949734 | 8 | 8q | 8qB1 | 8qB1.3 | 0      | 0      | 0 | 0 | 0       | 0 |
| 179 | chr8:56949734-60778287 | 8 | 8q | 8qB2 | 8qB2   | 0      | 0      | 0 | 0 | 0       | 0 |
| 180 | chr8:60778287-68435394 | 8 | 8q | 8qB3 | 8qB3.1 | 0      | 0      | 0 | 0 | 0       | 0 |
| 181 | chr8:68435394-69392533 | 8 | 8q | 8qB3 | 8qB3.2 | 0      | 0      | 0 | 0 | 0       | 0 |
| 182 | chr8:69392533-76092502 | 8 | 8q | 8qB3 | 8qB3.3 | 0      | 0      | 0 | 0 | 0       | 0 |
| 183 | chr8:76092502-         | 8 | 8q | 8qC1 | 8qC1   | 0      | 0      | 0 | 0 | 0       | 0 |

|     |                          |   |    |      |      |   |   |        |        |         |   |
|-----|--------------------------|---|----|------|------|---|---|--------|--------|---------|---|
|     | 81835332                 |   |    |      |      |   |   |        |        |         |   |
| 184 | chr8:81835332-86621024   | 8 | 8q | 8qC2 | 8qC2 | 0 | 0 | 1.9500 | 0      | 0       | 0 |
| 185 | chr8:86621024-91885285   | 8 | 8q | 8qC3 | 8qC3 | 0 | 0 | 0      | 0      | 0       | 0 |
| 186 | chr8:91885285-93320993   | 8 | 8q | 8qC4 | 8qC4 | 0 | 0 | 0      | 0      | 0       | 0 |
| 187 | chr8:93320993-97628115   | 8 | 8q | 8qC5 | 8qC5 | 0 | 0 | 0      | 0      | 0       | 0 |
| 188 | chr8:97628115-105285223  | 8 | 8q | 8qD1 | 8qD1 | 0 | 0 | 0      | 0      | 0       | 0 |
| 189 | chr8:105285223-106242361 | 8 | 8q | 8qD2 | 8qD2 | 0 | 0 | 0      | 0      | 0       | 0 |
| 190 | chr8:106242361-112942330 | 8 | 8q | 8qD3 | 8qD3 | 0 | 0 | 0      | 0      | 0       | 0 |
| 191 | chr8:112942330-126342267 | 8 | 8q | 8qE1 | 8qE1 | 0 | 0 | 0      | 0.9900 | 0       | 0 |
| 192 | chr8:126342267-132085098 | 8 | 8q | 8qE2 | 8qE2 | 0 | 0 | 0      | 0      | 0       | 0 |
| 193 | chr9:0-14343360          | 9 | 9q | 9qA1 | 9qA1 | 0 | 0 | 0      | 0      | 0       | 0 |
| 194 | chr9:14343360-19432940   | 9 | 9q | 9qA2 | 9qA2 | 0 | 0 | 0      | 0      | -0.3100 | 0 |
| 195 | chr9:19432940-24059831   | 9 | 9q | 9qA3 | 9qA3 | 0 | 0 | 0      | 0      | -0.3100 | 0 |



|     |                         |   |    |      |        |   |   |   |   |   |   |
|-----|-------------------------|---|----|------|--------|---|---|---|---|---|---|
| 196 | chr9:24059831-37940503  | 9 | 9q | 9qA4 | 9qA4   | 0 | 0 | 0 | 0 | 0 | 0 |
| 197 | chr9:37940503-43955461  | 9 | 9q | 9qA5 | 9qA5.1 | 0 | 0 | 0 | 0 | 0 | 0 |
| 198 | chr9:43955461-46268906  | 9 | 9q | 9qA5 | 9qA5.2 | 0 | 0 | 0 | 0 | 0 | 0 |
| 199 | chr9:46268906-54597309  | 9 | 9q | 9qA5 | 9qA5.3 | 0 | 0 | 0 | 0 | 0 | 0 |
| 200 | chr9:54597309-62925712  | 9 | 9q | 9qB  | 9qB    | 0 | 0 | 0 | 0 | 0 | 0 |
| 201 | chr9:62925712-69403359  | 9 | 9q | 9qC  | 9qC    | 0 | 0 | 0 | 0 | 0 | 0 |
| 202 | chr9:69403359-77269073  | 9 | 9q | 9qD  | 9qD    | 0 | 0 | 0 | 0 | 0 | 0 |
| 203 | chr9:77269073-82358653  | 9 | 9q | 9qE1 | 9qE1   | 0 | 0 | 0 | 0 | 0 | 0 |
| 204 | chr9:82358653-84209409  | 9 | 9q | 9qE2 | 9qE2   | 0 | 0 | 0 | 0 | 0 | 0 |
| 205 | chr9:84209409-90687056  | 9 | 9q | 9qE3 | 9qE3.1 | 0 | 0 | 0 | 0 | 0 | 0 |
| 206 | chr9:90687056-91149745  | 9 | 9q | 9qE3 | 9qE3.2 | 0 | 0 | 0 | 0 | 0 | 0 |
| 207 | chr9:91149745-100403526 | 9 | 9q | 9qE3 | 9qE3.3 | 0 | 0 | 0 | 0 | 0 | 0 |
| 208 | chr9:100403526          | 9 | 9q | 9qE4 | 9qE4   | 0 | 0 | 0 | 0 | 0 | 0 |

|     |                              |    |     |           |       |   |   |         |        |         |         |         |
|-----|------------------------------|----|-----|-----------|-------|---|---|---------|--------|---------|---------|---------|
|     | -101328904                   |    |     |           |       |   |   |         |        |         |         |         |
| 209 | chr9:101328904<br>-107806551 | 9  | 9q  | 9qF1      | 9qF1  | 0 | 0 | 0       | 0      | 0       | 0       | 0       |
| 210 | chr9:107806551<br>-110582686 | 9  | 9q  | 9qF2      | 9qF2  | 0 | 0 | 0       | 0      | 0       | 0       | 0       |
| 211 | chr9:110582686<br>-119373778 | 9  | 9q  | 9qF3      | 9qF3  | 0 | 0 | 0       | 0      | 0       | 0       | 0       |
| 212 | chr9:119373778<br>-124000669 | 9  | 9q  | 9qF4      | 9qF4  | 0 | 0 | 0       | 0.9400 | 0       | 0       | 0       |
| 213 | chr10:0-<br>12750708         | 10 | 10q | 10qA<br>1 | 10qA1 | 0 | 0 | 0       | 0      | 0       | 0       | 0       |
| 214 | chr10:12750708<br>-17654827  | 10 | 10q | 10qA<br>2 | 10qA2 | 0 | 0 | 0       | 0      | 0       | 0       | 0       |
| 215 | chr10:17654827<br>-23539770  | 10 | 10q | 10qA<br>3 | 10qA3 | 0 | 0 | 0       | 0      | 0       | 0       | 0       |
| 216 | chr10:23539770<br>-33348007  | 10 | 10q | 10qA<br>4 | 10qA4 | 0 | 0 | 0       | 0      | -0.2500 | -0.2600 | -0.2600 |
| 217 | chr10:33348007<br>-41194597  | 10 | 10q | 10qB<br>1 | 10qB1 | 0 | 0 | 0       | 0      | -0.2500 | -0.2600 | -0.2600 |
| 218 | chr10:41194597<br>-48060364  | 10 | 10q | 10qB<br>2 | 10qB2 | 0 | 0 | -0.3000 | 0      | 0       | 0       | 0       |
| 219 | chr10:48060364<br>-55906954  | 10 | 10q | 10qB<br>3 | 10qB3 | 0 | 0 | -0.3000 | 0      | 0       | 0       | 0       |
| 220 | chr10:55906954<br>-63753544  | 10 | 10q | 10qB<br>4 | 10qB4 | 0 | 0 | -0.3000 | 0      | 0       | 0       | 0       |

|     |                           |    |     |       |         |   |        |         |        |   |   |
|-----|---------------------------|----|-----|-------|---------|---|--------|---------|--------|---|---|
| 221 | chr10:63753544-67676839   | 10 | 10q | 10qB5 | 10qB5.1 | 0 | 0      | 0       | 0      | 0 | 0 |
| 222 | chr10:67676839-68167251   | 10 | 10q | 10qB5 | 10qB5.2 | 0 | 0      | 0       | 0      | 0 | 0 |
| 223 | chr10:68167251-74542605   | 10 | 10q | 10qB5 | 10qB5.3 | 0 | 0      | 0       | 0      | 0 | 0 |
| 224 | chr10:74542605-88764550   | 10 | 10q | 10qC1 | 10qC1   | 0 | 0      | 0       | 0      | 0 | 0 |
| 225 | chr10:88764550-95630316   | 10 | 10q | 10qC2 | 10qC2   | 0 | 1.3300 | 1.2100  | 1.2400 | 0 | 0 |
| 226 | chr10:95630316-98572787   | 10 | 10q | 10qC3 | 10qC3   | 0 | 0      | -0.2800 | 0      | 0 | 0 |
| 227 | chr10:98572787-111323496  | 10 | 10q | 10qD1 | 10qD1   | 0 | 0      | -0.2800 | 0      | 0 | 0 |
| 228 | chr10:111323496-124074205 | 10 | 10q | 10qD2 | 10qD2   | 0 | 0      | 0       | 0      | 0 | 0 |
| 229 | chr10:124074205-129959148 | 10 | 10q | 10qD3 | 10qD3   | 0 | 0      | 0       | 0      | 0 | 0 |
| 230 | chr11:0-13016647          | 11 | 11q | 11qA1 | 11qA1   | 0 | 0      | 0       | 0      | 0 | 0 |
| 231 | chr11:13016647-17200570   | 11 | 11q | 11qA2 | 11qA2   | 0 | 0      | 0       | 0      | 0 | 0 |
| 232 | chr11:17200570-21849372   | 11 | 11q | 11qA3 | 11qA3.1 | 0 | 0      | 0       | 0      | 0 | 0 |
| 233 | chr11:21849372            | 11 | 11q | 11qA  | 11qA3.  | 0 | 0      | 0       | 0      | 0 | 0 |

|     |                          |    |     |       |         |   |        |        |        |        |        |
|-----|--------------------------|----|-----|-------|---------|---|--------|--------|--------|--------|--------|
|     | -25568415                |    |     | 3     | 2       |   |        |        |        |        |        |
| 234 | chr11:25568415-30217217  | 11 | 11q | 11qA3 | 11qA3.3 | 0 | 0      | 0      | 0      | 0      | 0      |
| 235 | chr11:30217217-36260661  | 11 | 11q | 11qA4 | 11qA4   | 0 | 0      | 1.5300 | 1.2400 | 0      | 0      |
| 236 | chr11:36260661-43233865  | 11 | 11q | 11qA5 | 11qA5   | 0 | 0      | 0      | 0      | 0      | 0      |
| 237 | chr11:43233865-47882668  | 11 | 11q | 11qB1 | 11qB1.1 | 0 | 1.2900 | 0      | 1.2000 | 0      | 0      |
| 238 | chr11:47882668-49742189  | 11 | 11q | 11qB1 | 11qB1.2 | 0 | 0      | 0      | 0      | 0      | 0      |
| 239 | chr11:49742189-59969555  | 11 | 11q | 11qB1 | 11qB1.3 | 0 | 0      | 0      | 0      | 0      | 0      |
| 240 | chr11:59969555-62758837  | 11 | 11q | 11qB2 | 11qB2   | 0 | 0      | 0      | 0      | 0      | 0      |
| 241 | chr11:62758837-70661801  | 11 | 11q | 11qB3 | 11qB3   | 0 | 0      | 0.5200 | 0.5000 | 0.4400 | 0.4200 |
| 242 | chr11:70661801-73915963  | 11 | 11q | 11qB4 | 11qB4   | 0 | 0      | 0.5200 | 0.5000 | 0.4400 | 0.4200 |
| 243 | chr11:73915963-81818928  | 11 | 11q | 11qB5 | 11qB5   | 0 | 0      | 0.5200 | 0.5000 | 0.2600 | 0.4200 |
| 244 | chr11:81818928-90186773  | 11 | 11q | 11qC  | 11qC    | 0 | 0      | 0.5200 | 0.5000 | 0.4400 | 0.4200 |
| 245 | chr11:90186773-102273660 | 11 | 11q | 11qD  | 11qD    | 0 | 0      | 0.5200 | 0.5000 | 0.4400 | 0.4200 |

|     |                               |    |     |           |             |        |        |        |        |        |        |
|-----|-------------------------------|----|-----|-----------|-------------|--------|--------|--------|--------|--------|--------|
| 246 | chr11:10227366<br>0-110176625 | 11 | 11q | 11qE<br>1 | 11qE1       | 0      | 0      | 0.5200 | 0.5000 | 0.4400 | 0.4200 |
| 247 | chr11:11017662<br>5-121798632 | 11 | 11q | 11qE<br>2 | 11qE2       | 0      | 0      | 0.5200 | 0.5000 | 0.4400 | 0.4200 |
| 248 | chr12:0-<br>17650279          | 12 | 12q | 12qA<br>1 | 12qA1.<br>1 | 0      | 0      | 0      | 0      | 0      | 0      |
| 249 | chr12:17650279<br>-21180335   | 12 | 12q | 12qA<br>1 | 12qA1.<br>2 | 0      | 0      | 0      | 0      | 0      | 0      |
| 250 | chr12:21180335<br>-26034162   | 12 | 12q | 12qA<br>1 | 12qA1.<br>3 | 0      | 0      | 0      | 0      | 0      | 0      |
| 251 | chr12:26034162<br>-31770503   | 12 | 12q | 12qA<br>2 | 12qA2       | 2.4000 | 2.2000 | 2.0700 | 2.4200 | 0      | 0      |
| 252 | chr12:31770503<br>-39271872   | 12 | 12q | 12qA<br>3 | 12qA3       | 1.1800 | 1.2200 | 1.0500 | 1.1200 | 0.9700 | 1.0400 |
| 253 | chr12:39271872<br>-44125699   | 12 | 12q | 12qB<br>1 | 12qB1       | 0      | 0      | 0      | 0      | 0      | 0      |
| 254 | chr12:44125699<br>-45008213   | 12 | 12q | 12qB<br>2 | 12qB2       | 0      | 0      | 0      | 0      | 0      | 0      |
| 255 | chr12:45008213<br>-52068325   | 12 | 12q | 12qB<br>3 | 12qB3       | 0      | 0      | 0      | 0      | 0      | 0      |
| 256 | chr12:52068325<br>-66188548   | 12 | 12q | 12qC<br>1 | 12qC1       | 0      | 0      | 0      | 0      | 0      | 0      |
| 257 | chr12:66188548<br>-71483632   | 12 | 12q | 12qC<br>2 | 12qC2       | 0      | 0      | 0      | 0      | 0      | 0      |
| 258 | chr12:71483632                | 12 | 12q | 12qC      | 12qC3       | 0      | 0      | 0      | 0      | 0      | 0      |

|     |                           |    |     |       |         |   |   |   |   |         |   |
|-----|---------------------------|----|-----|-------|---------|---|---|---|---|---------|---|
|     | -81191286                 |    |     | 3     |         |   |   |   |   |         |   |
| 259 | chr12:81191286-85603856   | 12 | 12q | 12qD1 | 12qD1   | 0 | 0 | 0 | 0 | 0       | 0 |
| 260 | chr12:85603856-88692655   | 12 | 12q | 12qD2 | 12qD2   | 0 | 0 | 0 | 0 | 0       | 0 |
| 261 | chr12:88692655-95752767   | 12 | 12q | 12qD3 | 12qD3   | 0 | 0 | 0 | 0 | 0       | 0 |
| 262 | chr12:95752767-106342935  | 12 | 12q | 12qE  | 12qE    | 0 | 0 | 0 | 0 | 0       | 0 |
| 263 | chr12:106342935-114726818 | 12 | 12q | 12qF1 | 12qF1   | 0 | 0 | 0 | 0 | 0       | 0 |
| 264 | chr12:114726818-120463159 | 12 | 12q | 12qF2 | 12qF2   | 0 | 0 | 0 | 0 | 0       | 0 |
| 265 | chr13:0-16312600          | 13 | 13q | 13qA1 | 13qA1   | 0 | 0 | 0 | 0 | 0       | 0 |
| 266 | chr13:16312600-21255812   | 13 | 13q | 13qA2 | 13qA2   | 0 | 0 | 0 | 0 | -0.3700 | 0 |
| 267 | chr13:21255812-29659273   | 13 | 13q | 13qA3 | 13qA3.1 | 0 | 0 | 0 | 0 | 0       | 0 |
| 268 | chr13:29659273-33119521   | 13 | 13q | 13qA3 | 13qA3.2 | 0 | 0 | 0 | 0 | 0       | 0 |
| 269 | chr13:33119521-41522982   | 13 | 13q | 13qA3 | 13qA3.3 | 0 | 0 | 0 | 0 | 0       | 0 |
| 270 | chr13:41522982-44488909   | 13 | 13q | 13qA4 | 13qA4   | 0 | 0 | 0 | 0 | 0       | 0 |

|     |                           |    |     |       |         |   |   |   |   |        |        |
|-----|---------------------------|----|-----|-------|---------|---|---|---|---|--------|--------|
| 271 | chr13:44488909-52892370   | 13 | 13q | 13qA5 | 13qA5   | 0 | 0 | 0 | 0 | 0      | 0      |
| 272 | chr13:52892370-59318546   | 13 | 13q | 13qB1 | 13qB1   | 0 | 0 | 0 | 0 | 0      | 0      |
| 273 | chr13:59318546-61790152   | 13 | 13q | 13qB2 | 13qB2   | 0 | 0 | 0 | 0 | 0      | 0      |
| 274 | chr13:61790152-69699292   | 13 | 13q | 13qB3 | 13qB3   | 0 | 0 | 0 | 0 | 0      | 0      |
| 275 | chr13:69699292-78597074   | 13 | 13q | 13qC1 | 13qC1   | 0 | 0 | 0 | 0 | 0      | 0      |
| 276 | chr13:78597074-81068680   | 13 | 13q | 13qC2 | 13qC2   | 0 | 0 | 0 | 0 | 0      | 0      |
| 277 | chr13:81068680-94909674   | 13 | 13q | 13qC3 | 13qC3   | 0 | 0 | 0 | 0 | 0      | 0      |
| 278 | chr13:94909674-106773383  | 13 | 13q | 13qD1 | 13qD1   | 0 | 0 | 0 | 0 | 0.8100 | 0.8700 |
| 279 | chr13:106773383-110727953 | 13 | 13q | 13qD2 | 13qD2.1 | 0 | 0 | 0 | 0 | 0      | 0      |
| 280 | chr13:110727953-116659808 | 13 | 13q | 13qD2 | 13qD2.2 | 0 | 0 | 0 | 0 | 0      | 0      |
| 281 | chr13:116659808-120614378 | 13 | 13q | 13qD2 | 13qD2.3 | 0 | 0 | 0 | 0 | 0      | 0      |
| 282 | chr14:0-14877464          | 14 | 14q | 14qA1 | 14qA1   | 0 | 0 | 0 | 0 | 0      | 0      |
| 283 | chr14:14877464            | 14 | 14q | 14qA  | 14qA2   | 0 | 0 | 0 | 0 | 0      | 0      |

|     |                              |    |     |           |             |        |        |         |        |         |        |   |
|-----|------------------------------|----|-----|-----------|-------------|--------|--------|---------|--------|---------|--------|---|
|     | -19340703                    |    |     | 2         |             |        |        |         |        |         |        |   |
| 284 | chr14:19340703<br>-29754928  | 14 | 14q | 14qA<br>3 | 14qA3       | 0      | 0      | 0       | 0      | 0       | 0      | 0 |
| 285 | chr14:29754928<br>-43144646  | 14 | 14q | 14qB      | 14qB        | 0      | 0      | 0       | 0      | 0       | 0      | 0 |
| 286 | chr14:43144646<br>-51575209  | 14 | 14q | 14qC<br>1 | 14qC1       | 0      | 0      | -0.2400 | 0      | -0.3000 | 0      | 0 |
| 287 | chr14:51575209<br>-54550702  | 14 | 14q | 14qC<br>2 | 14qC2       | 0.6200 | 0.6300 | 0.5600  | 0.5500 | 0.5500  | 0.5600 | 0 |
| 288 | chr14:54550702<br>-59509857  | 14 | 14q | 14qC<br>3 | 14qC3       | 0      | 0      | 0       | 0      | 0       | 0      | 0 |
| 289 | chr14:59509857<br>-68436336  | 14 | 14q | 14qD<br>1 | 14qD1       | 0      | 0.8300 | 0.3600  | 0.4400 | 0.3000  | 0      | 0 |
| 290 | chr14:68436336<br>-72403660  | 14 | 14q | 14qD<br>2 | 14qD2       | 0      | 0      | 0       | 0      | 0       | 0      | 0 |
| 291 | chr14:72403660<br>-84305631  | 14 | 14q | 14qD<br>3 | 14qD3       | 0      | 0      | 0       | 0      | 0       | 0      | 0 |
| 292 | chr14:84305631<br>-88272955  | 14 | 14q | 14qE<br>1 | 14qE1       | 0      | 0      | 0       | 0      | 0       | 0      | 0 |
| 293 | chr14:88272955<br>-98191265  | 14 | 14q | 14qE<br>2 | 14qE2.<br>1 | 0      | 0      | 0       | 0      | 0       | 0      | 0 |
| 294 | chr14:98191265<br>-99183096  | 14 | 14q | 14qE<br>2 | 14qE2.<br>2 | 0      | 0      | 0       | 0      | 0       | 0      | 0 |
| 295 | chr14:99183096<br>-106621828 | 14 | 14q | 14qE<br>2 | 14qE2.<br>3 | 0      | 0      | 0       | 0      | 0       | 0      | 0 |



|     |                               |    |     |           |             |   |   |        |   |        |        |
|-----|-------------------------------|----|-----|-----------|-------------|---|---|--------|---|--------|--------|
| 296 | chr14:10662182<br>8-110093236 | 14 | 14q | 14qE<br>3 | 14qE3       | 0 | 0 | 0      | 0 | 0      | 0      |
| 297 | chr14:11009323<br>6-120011546 | 14 | 14q | 14qE<br>4 | 14qE4       | 0 | 0 | 0      | 0 | 0      | 0      |
| 298 | chr14:12001154<br>6-123978870 | 14 | 14q | 14qE<br>5 | 14qE5       | 0 | 0 | 0      | 0 | 0      | 0      |
| 299 | chr15:0-<br>16412919          | 15 | 15q | 15qA<br>1 | 15qA1       | 0 | 0 | 0.3500 | 0 | 0.3400 | 0.4200 |
| 300 | chr15:16412919<br>-24163465   | 15 | 15q | 15qA<br>2 | 15qA2       | 0 | 0 | 0.3500 | 0 | 0.3400 | 0.4200 |
| 301 | chr15:24163465<br>-29634438   | 15 | 15q | 15qB<br>1 | 15qB1       | 0 | 0 | 0.3500 | 0 | 0.3400 | 0.4200 |
| 302 | chr15:29634438<br>-31914010   | 15 | 15q | 15qB<br>2 | 15qB2       | 0 | 0 | 0.3500 | 0 | 0.3400 | 0.4200 |
| 303 | chr15:31914010<br>-42855956   | 15 | 15q | 15qB<br>3 | 15qB3.<br>1 | 0 | 0 | 0.3500 | 0 | 0.3400 | 0.4200 |
| 304 | chr15:42855956<br>-44679614   | 15 | 15q | 15qB<br>3 | 15qB3.<br>2 | 0 | 0 | 0.3500 | 0 | 0.3400 | 0.4200 |
| 305 | chr15:44679614<br>-49694673   | 15 | 15q | 15qB<br>3 | 15qB3.<br>3 | 0 | 0 | 0.3500 | 0 | 0.3400 | 0.4200 |
| 306 | chr15:49694673<br>-53341989   | 15 | 15q | 15qC      | 15qC        | 0 | 0 | 0.3500 | 0 | 0.3400 | 0.4200 |
| 307 | chr15:53341989<br>-66107593   | 15 | 15q | 15qD<br>1 | 15qD1       | 0 | 0 | 0.3500 | 0 | 0.3400 | 0.4200 |
| 308 | chr15:66107593                | 15 | 15q | 15qD      | 15qD2       | 0 | 0 | 0.4300 | 0 | 0.4200 | 0.5000 |

|     |                           |    |     |       |       |   |   |        |   |        |        |
|-----|---------------------------|----|-----|-------|-------|---|---|--------|---|--------|--------|
|     | -68387165                 |    |     | 2     |       |   |   |        |   |        |        |
| 309 | chr15:68387165-77049539   | 15 | 15q | 15qD3 | 15qD3 | 0 | 0 | 0.4300 | 0 | 0.4200 | 0.5000 |
| 310 | chr15:77049539-83432341   | 15 | 15q | 15qE1 | 15qE1 | 0 | 0 | 0.4900 | 0 | 0.4200 | 0.5000 |
| 311 | chr15:83432341-86623742   | 15 | 15q | 15qE2 | 15qE2 | 0 | 0 | 0.4900 | 0 | 0.4200 | 0.5000 |
| 312 | chr15:86623742-95286117   | 15 | 15q | 15qE3 | 15qE3 | 0 | 0 | 0.4900 | 0 | 0.4200 | 0.5000 |
| 313 | chr15:95286117-100757090  | 15 | 15q | 15qF1 | 15qF1 | 0 | 0 | 0.4900 | 0 | 0.4200 | 0.5000 |
| 314 | chr15:100757090-101668919 | 15 | 15q | 15qF2 | 15qF2 | 0 | 0 | 0.4900 | 0 | 0.4200 | 0.5000 |
| 315 | chr15:101668919-103492577 | 15 | 15q | 15qF3 | 15qF3 | 0 | 0 | 0.4300 | 0 | 0.4200 | 0.5000 |
| 316 | chr16:0-15439672          | 16 | 16q | 16qA1 | 16qA1 | 0 | 0 | 0      | 0 | 0      | 0      |
| 317 | chr16:15439672-16375409   | 16 | 16q | 16qA2 | 16qA2 | 0 | 0 | 0      | 0 | 0      | 0      |
| 318 | chr16:16375409-20586229   | 16 | 16q | 16qA3 | 16qA3 | 0 | 0 | 0      | 0 | 0      | 0      |
| 319 | chr16:20586229-26200655   | 16 | 16q | 16qB1 | 16qB1 | 0 | 0 | 0      | 0 | 0      | 0      |
| 320 | chr16:26200655-32282950   | 16 | 16q | 16qB2 | 16qB2 | 0 | 0 | 0      | 0 | 0      | 0      |

|     |                         |    |     |       |         |        |        |   |        |   |   |
|-----|-------------------------|----|-----|-------|---------|--------|--------|---|--------|---|---|
| 321 | chr16:32282950-38365245 | 16 | 16q | 16qB3 | 16qB3   | 0      | 0      | 0 | 0      | 0 | 0 |
| 322 | chr16:38365245-44915409 | 16 | 16q | 16qB4 | 16qB4   | 1.0200 | 1.0000 | 0 | 0.9100 | 0 | 0 |
| 323 | chr16:44915409-53804918 | 16 | 16q | 16qB5 | 16qB5   | 0      | 0      | 0 | 0      | 0 | 0 |
| 324 | chr16:53804918-58015737 | 16 | 16q | 16qC1 | 16qC1.1 | 0      | 0      | 0 | 0      | 0 | 0 |
| 325 | chr16:58015737-58951475 | 16 | 16q | 16qC1 | 16qC1.2 | 0      | 0      | 0 | 0      | 0 | 0 |
| 326 | chr16:58951475-66905245 | 16 | 16q | 16qC1 | 16qC1.3 | 0      | 0      | 0 | 0      | 0 | 0 |
| 327 | chr16:66905245-70648196 | 16 | 16q | 16qC2 | 16qC2   | 0      | 0      | 0 | 0      | 0 | 0 |
| 328 | chr16:70648196-79069836 | 16 | 16q | 16qC3 | 16qC3.1 | 0      | 0      | 0 | 0      | 0 | 0 |
| 329 | chr16:79069836-79537704 | 16 | 16q | 16qC3 | 16qC3.2 | 0      | 0      | 0 | 0      | 0 | 0 |
| 330 | chr16:79537704-91702295 | 16 | 16q | 16qC3 | 16qC3.3 | 0      | 0      | 0 | 0      | 0 | 0 |
| 331 | chr16:91702295-98252459 | 16 | 16q | 16qC4 | 16qC4   | 0      | 0      | 0 | 0      | 0 | 0 |
| 332 | chr17:0-13970997        | 17 | 17q | 17qA1 | 17qA1   | 0      | 0      | 0 | 0      | 0 | 0 |
| 333 | chr17:13970997          | 17 | 17q | 17qA  | 17qA2   | 0      | 0      | 0 | 0      | 0 | 0 |

|     |                             |    |     |           |             |             |             |         |         |         |         |
|-----|-----------------------------|----|-----|-----------|-------------|-------------|-------------|---------|---------|---------|---------|
|     | -16153965                   |    |     | 2         |             |             |             |         |         |         |         |
| 334 | chr17:16153965<br>-17463746 | 17 | 17q | 17qA<br>3 | 17qA3.<br>1 | 0           | 0           | 0       | 0       | 0       | 0       |
| 335 | chr17:17463746<br>-21829683 | 17 | 17q | 17qA<br>3 | 17qA3.<br>2 | 0           | 0           | 0       | 0       | 0       | 0       |
| 336 | chr17:21829683<br>-31434744 | 17 | 17q | 17qA<br>3 | 17qA3.<br>3 | -<br>0.5000 | -<br>0.5400 | -0.5600 | -0.5100 | -0.5200 | -0.5300 |
| 337 | chr17:31434744<br>-40166617 | 17 | 17q | 17qB<br>1 | 17qB1       | 0           | 0           | 0       | 0.9400  | 0       | 0       |
| 338 | chr17:40166617<br>-41476398 | 17 | 17q | 17qB<br>2 | 17qB2       | 0           | 0           | 0       | 0       | 0       | 0       |
| 339 | chr17:41476398<br>-45842335 | 17 | 17q | 17qB<br>3 | 17qB3       | 0           | 0           | 0       | 0       | 0       | 0       |
| 340 | chr17:45842335<br>-55883989 | 17 | 17q | 17qC      | 17qC        | 0           | 0           | 0       | 0       | 0       | 0       |
| 341 | chr17:55883989<br>-60249926 | 17 | 17q | 17qD      | 17qD        | 0           | 0           | 0       | 0       | 0       | 0       |
| 342 | chr17:60249926<br>-68108612 | 17 | 17q | 17qE<br>1 | 17qE1.<br>1 | 0           | 0           | 0       | 0       | 0       | 0       |
| 343 | chr17:68108612<br>-68981799 | 17 | 17q | 17qE<br>1 | 17qE1.<br>2 | 0           | 0           | 0       | 0       | 0       | 0       |
| 344 | chr17:68981799<br>-73347736 | 17 | 17q | 17qE<br>1 | 17qE1.<br>3 | 0           | 0           | 0       | 0       | 0       | 0       |
| 345 | chr17:73347736<br>-78586860 | 17 | 17q | 17qE<br>2 | 17qE2       | 0           | 0           | 0       | 0       | 0       | 0       |

|     |                         |    |     |       |       |   |   |   |   |         |   |
|-----|-------------------------|----|-----|-------|-------|---|---|---|---|---------|---|
| 346 | chr17:78586860-82952797 | 17 | 17q | 17qE3 | 17qE3 | 0 | 0 | 0 | 0 | 0       | 0 |
| 347 | chr17:82952797-89065108 | 17 | 17q | 17qE4 | 17qE4 | 0 | 0 | 0 | 0 | 0       | 0 |
| 348 | chr17:89065108-95177420 | 17 | 17q | 17qE5 | 17qE5 | 0 | 0 | 0 | 0 | 0       | 0 |
| 349 | chr18:0-19413462        | 18 | 18q | 18qA1 | 18qA1 | 0 | 0 | 0 | 0 | 0       | 0 |
| 350 | chr18:19413462-29542226 | 18 | 18q | 18qA2 | 18qA2 | 0 | 0 | 0 | 0 | 0       | 0 |
| 351 | chr18:29542226-35450671 | 18 | 18q | 18qB1 | 18qB1 | 0 | 0 | 0 | 0 | 0       | 0 |
| 352 | chr18:35450671-37138798 | 18 | 18q | 18qB2 | 18qB2 | 0 | 0 | 0 | 0 | 0       | 0 |
| 353 | chr18:37138798-45579434 | 18 | 18q | 18qB3 | 18qB3 | 0 | 0 | 0 | 0 | 0       | 0 |
| 354 | chr18:45579434-49799752 | 18 | 18q | 18qC  | 18qC  | 0 | 0 | 0 | 0 | 0       | 0 |
| 355 | chr18:49799752-54020070 | 18 | 18q | 18qD1 | 18qD1 | 0 | 0 | 0 | 0 | -0.6200 | 0 |
| 356 | chr18:54020070-54442102 | 18 | 18q | 18qD2 | 18qD2 | 0 | 0 | 0 | 0 | 0       | 0 |
| 357 | chr18:54442102-60772579 | 18 | 18q | 18qD3 | 18qD3 | 0 | 0 | 0 | 0 | 0       | 0 |
| 358 | chr18:60772579          | 18 | 18q | 18qE  | 18qE1 | 0 | 0 | 0 | 0 | 0       | 0 |

|     |                             |    |     |           |       |        |        |         |         |         |         |   |
|-----|-----------------------------|----|-----|-----------|-------|--------|--------|---------|---------|---------|---------|---|
|     | -67947119                   |    |     | 1         |       |        |        |         |         |         |         |   |
| 359 | chr18:67947119<br>-75121660 | 18 | 18q | 18qE<br>2 | 18qE2 | 0      | 0      | 0       | 0       | 0       | 0       | 0 |
| 360 | chr18:75121660<br>-83562296 | 18 | 18q | 18qE<br>3 | 18qE3 | 0      | 0      | 0       | 0       | 0       | 0       | 0 |
| 361 | chr18:83562296<br>-90736837 | 18 | 18q | 18qE<br>4 | 18qE4 | 0      | 0      | 0       | 0       | 0       | 0       | 0 |
| 362 | chr19:0-<br>16650124        | 19 | 19q | 19qA      | 19qA  | 0      | 0      | -0.9900 | -0.9900 | -0.7500 | -0.5600 |   |
| 363 | chr19:16650124<br>-25584337 | 19 | 19q | 19qB      | 19qB  | 0      | 0      | 0       | 0       | 0       | 0       | 0 |
| 364 | chr19:25584337<br>-34924651 | 19 | 19q | 19qC<br>1 | 19qC1 | 0      | 0      | 0       | 0       | 0       | 0       | 0 |
| 365 | chr19:34924651<br>-38173456 | 19 | 19q | 19qC<br>2 | 19qC2 | 0      | 0      | 0       | 0       | 0       | 0       | 0 |
| 366 | chr19:38173456<br>-47513769 | 19 | 19q | 19qC<br>3 | 19qC3 | 0.9800 | 0.9900 | 1.0100  | 1.0400  | 0       | 1.2500  |   |
| 367 | chr19:47513769<br>-51574775 | 19 | 19q | 19qD<br>1 | 19qD1 | 0      | 0      | 0       | 0       | 0       | 0       | 0 |
| 368 | chr19:51574775<br>-58884586 | 19 | 19q | 19qD<br>2 | 19qD2 | 0      | 0      | 0       | 0       | -0.7300 | 0       |   |
| 369 | chr19:58884586<br>-61321190 | 19 | 19q | 19qD<br>3 | 19qD3 | 0      | 0      | 0       | 0       | -0.4200 | 0       |   |

**Supplementary table 1: Chromosomal aberrations defined with the following parameters:**

ADM2 method for segmentation with threshold 6, Log2 ratio > 0.25, and numbers of probes  $\geq 5$ .

Average values are provided for tumours derived from irradiated TGF $\alpha$ -treated astrocytes

growing as adherent cells (n=5) and from irradiated TGF $\alpha$ -treated astrocytes growing as floating cells (n=3).
