# Supplementary material
Source: PubMed Central journal article supplement (PMC3245240)
Supplement: halms439883-supplement_2.pdf [file halms439883-supplement_2.pdf]

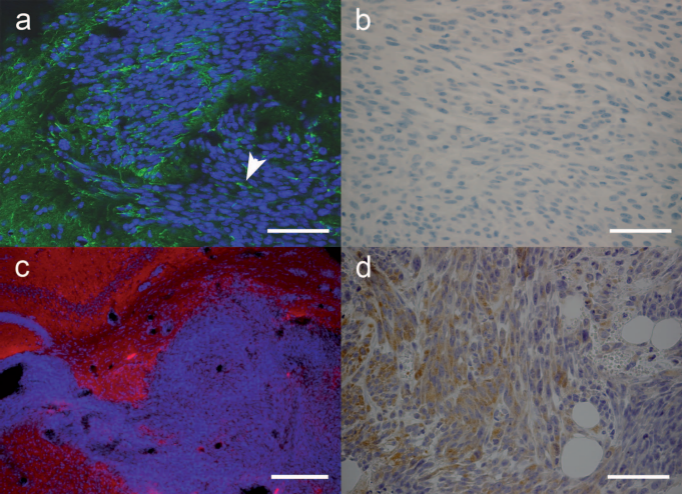

**Supplementary Figure 1: Comparison of GFAP and synaptophysin expression in irradiated TGF $\alpha$ -treated astrocytes in intra-cerebral and subcutaneous grafts. a. GFAP-immunoreactive cells were observed within the core of the CNS tumors (arrow, 480 nm thick ApoTome optical slice). b. In contrast, no GFAP immunolabeling was detected in subcutaneous grafts. c. Synaptophysin immunolabeling was restricted to the host tissue in the case of intra-cerebral grafts. d. Numerous synaptophysin immunoreactive cells were observed within the subcutaneous tumors. Bar=100  $\mu$ m in a, b, d and 200  $\mu$ m in c.**
